# Supplementary material for: Plasmodium infection prevents recurrence and metastasis of hepatocellular carcinoma possibly via inhibition of the epithelial-mesenchymal transition
Source: PubMed Central journal article supplement — Mol Med Rep. 2021 Mar 31;23(6):418. doi: 10.3892/mmr.2021.12057 (PMC8025467; doi:10.3892/mmr.2021.12057), 2021-03-31

Figure S1. *Plasmodium* infection of RBCs in the tumour resection model. (A) Microscopic view of parasitaemia during infection. The arrow indicates the infected RBCs. (B) Curve of the parasitaemia initiation, peak and decline in the tumour resection model (n=13). Data are presented as the mean  $\pm$  SD. RBC, red blood cell.

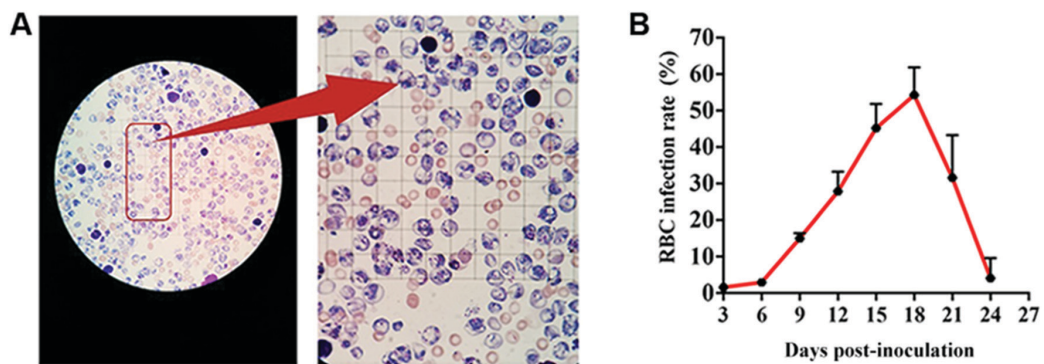

Figure S2. Curve of parasitaemia initiation, peak and decline in the tumour non-resection model (n=9). Data are presented as the mean  $\pm$  SD. RBC, red blood cell.

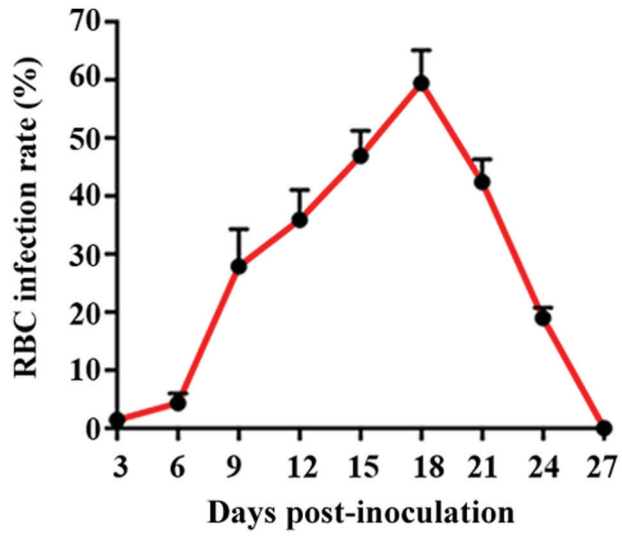

Supplement: Supplementary_Data.pdf [file Supplementary_Data.pdf]
